# Supplementary material for: Stock Assessment of Chub Mackerel (Scomber japonicus) in the Northwest Pacific Using a Multi-Model Approach
Source: MDPI journal article supplement (doi:10.3390/fishes8020080), 2023-01-30
Supplement: s1 [file s1]

Archive with 1 entries (1 files):
- fishes-2099111-supplementary.pdf
